# Supplementary material for: PEAR, a flexible fluorescent reporter for the identification and enrichment of successfully prime edited cells
Source: eLife. 2022 Feb 23;11:e69504. doi: 10.7554/eLife.69504 (PMC8865850; doi:10.7554/eLife.69504)
Supplement: Figure 1—figure supplement 1—source data 1. [file elife-69504-fig1-figsupp1-data1.xlsx]

## Sheet: e
	mScarlet positive cells (%)			GFP disruption (%)
EGFP site 4	32.876	23.748	29.969	6.612	10.349	7.935
EGFP site 16	30.794	30.882	27.283	8.888	8.997	16.227
EGFP site 4	0.035	0.009	0.009	2.75	2.586	3.486
EGFP site 16	0.009	0.042	0.035	6.644	5.728	4.78
EGFP site 4 & 16	0.016	0.019	0.009	27.267	24.242	23.034
EGFP site 4	0.008	0.011	0.025	24.466	29.951	25.66
EGFP site 16	0	0	0	44.832	42.109	42.444
untransfected	0	0	0	2.281	2.131	2.113
