# Supplementary material for: PEAR, a flexible fluorescent reporter for the identification and enrichment of successfully prime edited cells
Source: eLife. 2022 Feb 23;11:e69504. doi: 10.7554/eLife.69504 (PMC8865850; doi:10.7554/eLife.69504)
Supplement: Figure 1—source data 1. [file elife-69504-fig1-data1.xlsx]

## Sheet: figure 1b
RT	16			24			33
PBS	10	13	16	10	13	16	10	13	16	average
+89	40.4	39.4	31.7	59.9	56.2	51.1	58.4	42.6	45.3	47.2
+17	48.8	39.4	33.7	67.8	59.1	53.9	64.2	46.8	45	51
-59	40.1	31.4	24.7	51.1	39.6	42	48.3	22.4	19.3	35.4
-100	37.9	36.3	31.2	62	52.5	53.5	59.2	36.5	31.8	44.5
-162	38.9	36.2	33.3	60.3	53.8	54.5	60	39.7	36	45.9
No nick	29.3	22.4	19.2	59.8	44.8	42.3	50.4	29.9	24.1	35.8
Average	39.2	34.2	29	60.1	51	49.6	56.7	36.3	33.6

## Sheet: figure 1c
inactive sequence	active (edited sequence)	PE2 edited			inactive			active
	CAG-GT-AAGT-CCT							95.472	95.65	95.926
CAG-AC-AAGT-CCT	CAG-GT-AAGT-CCT	31.841	36.865	34.329	1.418	1.417	1.685
CAG-CCT	CAG-GT-AAGT-CCT	27.748	28.767	26.715	0.096	0.082	0.034
CA-AAGT-CCT	CAG-GT-AAGT-CCT	20.201	20.154	24.644	0.072	0.081	0.011
AC-AAGT-CCT	CAG-GT-AAGT-CCT	27.085	25.828	24.643	0.058	0.082	0.057
CAG-TGAG-CCT	CAG-GT-AAGT-CCT	17.309	20.792	19.452	0.046	0.034	0.081
C-AC-AAGT-CCT	CAG-GT-AAGT-CCT	19.261	17.312	17.246	0.056	0.067	0.035
CAGA-GT-AAGT-CCT	CAG-GT-AAGT-CCT	35.39	36.926	38.041	0.034	0.068	0.058
CAGAA-GT-AAGT-CCT	CAG-GT-AAGT-CCT	18.409	19.437	22.102	0.692	0.639	0.459
CTAG-GT-AAGT-CCT	CAG-GT-AAGT-CCT	32.827	30.494	23.801	0.011	0.057	0.068
CAG-GAT-AAGT-CCT	CAG-GT-AAGT-CCT	31.43	23.097	29.474	0.056	0.045	0.04
CAG-GACT-AAGT-CCT	CAG-GT-AAGT-CCT	33.323	33.946	33.227	0	0.034	0.09
CAGAC-GT-AAGT-CCT	CAG-GT-AAGT-CCT	31.784	35.012	36.347	0.033	0.023	0.091
CAGTGA-GT-AAGT-CCT	CAG-GT-AAGT-CCT	48.091	48.175	48.468	0.064	0.056	0.056

## Sheet: figure 1d
inactive site	PE2 edited			inactive			active
G-AC-AAGT	31.841	36.865	34.329	1.418	1.417	1.685	95.472	95.65	95.926
G-CT-AAGT	47.428	37.788	43.994	3.673	3.372	4.5
G-AC-TGCG	6.209	6.416	5.911	0.048	0.037	0.047	81.387	78.788	81.804
G-CT-TGCG	11.985	13.968	12.406	0.036	0.024	0.035
A-AC-AAGT	43.826	45.291	43.589	0.011	0.084	0.036	91.979	91.09	90.569
A-CT-AAGT	71.955	72.528	70.287	0.045	0.023	0.046
G-AC-CCTA	21.382	21.335	20.555	0.056	0.045	0.046	93.311	88.002	87.134
G-CT-CCTA	37.142	37.214	36.842	0.034	0.011	0.104
