# Supplementary material for: PEAR, a flexible fluorescent reporter for the identification and enrichment of successfully prime edited cells
Source: eLife. 2022 Feb 23;11:e69504. doi: 10.7554/eLife.69504 (PMC8865850; doi:10.7554/eLife.69504)
Supplement: Figure 2—figure supplement 2—source data 1. [file elife-69504-fig2-figsupp2-data1.xlsx]

## Sheet: b
	plasmid										cell line
	38			42			46			average	38			42			46			average
	10	13	16	10	13	16	10	13	16		10	13	16	10	13	16	10	13	16
A	35.24	39.28	3.64	44.83	52.67	12.32	37.32	46.07	18.16	32.17	5.1	8.1	0.5	10.2	13.3	0.8	5.8	7.8	3.2	6.1
B	15.7	14.83	0.63	24.34	27.57	2.45	18.74	24.67	4.17	14.79	1	1.5	0.3	2.2	3.1	0.5	1.5	2.2	1.9	1.6
C	26.96	28.54	1.97	36.58	45.21	6.3	29.7	39.57	11.55	25.15	3.3	5.4	0.5	6.5	10.9	0.8	3.8	9.8	2.2	4.8
No nick	7.72	6.08	0.41	12.94	15.75	1.25	8.37	13.52	2.01	7.56	0.7	1.1	0.2	1	2.1	0.5	0.9	1.5	1.6	1.1
Average	21.41	22.18	1.66	29.67	35.3	5.58	23.53	30.96	8.97	-10	2.5	4.1	0.4	5	7.4	0.6	3	5.3	2.2	-1
