# Supplementary material for: PEAR, a flexible fluorescent reporter for the identification and enrichment of successfully prime edited cells
Source: eLife. 2022 Feb 23;11:e69504. doi: 10.7554/eLife.69504 (PMC8865850; doi:10.7554/eLife.69504)
Supplement: Figure 2—source data 1. [file elife-69504-fig2-data1.xlsx]

## Sheet: figure 2a
	plasmid										cell line
RT	22			26			33				22			26			33
PBS	10	13	16	10	13	16	10	13	16	average	10	13	16	10	13	16	10	13	16	average
A	34.8	53.5	41.9	40.3	48.8	42.7	31.6	43.7	37.2	41.6	14.25	26.88	17.27	18.99	29.67	18.18	13.88	13.92	11.25	18.26
B	22.5	43.1	30.6	30.4	38.2	34.6	20.1	30.3	22.3	30.2	8.25	15.73	9.51	10.2	15.98	10.53	6.86	7.58	6.48	10.12
C	28.7	49.5	35	37.4	44.2	41	27.6	36.9	30.7	36.8	12.23	23.07	13.06	15.64	23.44	15.69	9.71	11.93	9.09	14.87
No nick	7.9	21.8	15.7	12.9	23.1	19.4	9.1	12.1	10.6	14.7	4.82	8.16	6.4	6.21	8.38	7.56	5	5.98	5.37	6.43
Average	23.5	42	30.8	30.3	38.5	34.4	22.1	30.7	25.2		9.89	18.46	11.56	12.76	19.37	12.99	8.87	9.85	8.05

## Sheet: figure 2b
	plasmid										cell line
RT	31			35			39				31			35			39
PBS	10	13	16	10	13	16	10	13	16	average	10	13	16	10	13	16	10	13	16	average
A	56.48	55.26	21.15	65.22	60.03	25.94	57.49	58.71	20.8	46.79	22.9	17.4	1.6	25.5	22.4	2.1	18.6	14.9	1.9	14.1
B	30.31	26	6.8	37.56	32.54	8.71	36.44	32.19	7.71	24.25	5.2	3.9	0.7	6.6	4.8	0.9	6.3	3.5	0.8	3.6
C	45.9	45.16	13.73	58.15	51.23	17.04	51.26	52.67	15.94	39.01	14.2	12.3	1.1	20	14.3	1.8	12.4	10.5	1.1	9.7
No nick	16.5	15.98	4.39	25.94	21.5	5.79	21.08	22.61	5.8	15.51	2.8	2.6	0.6	4.4	3.4	1.1	5.1	2.8	0.6	2.6
Average	37.3	35.6	11.52	46.72	41.33	14.37	41.57	41.54	12.56		11.3	9	1	14.1	11.2	1.5	10.6	7.9	1.1
