# Supplementary material for: PEAR, a flexible fluorescent reporter for the identification and enrichment of successfully prime edited cells
Source: eLife. 2022 Feb 23;11:e69504. doi: 10.7554/eLife.69504 (PMC8865850; doi:10.7554/eLife.69504)
Supplement: Figure 3—figure supplement 1—source data 1. [file elife-69504-fig3-figsupp1-data1.xlsx]

## Sheet: Sheet1
	Untransfected			EMX1			RNF2			FANCF			HEK3
Day 0	0.001	0.001	0.001	100	100	100	100	100	100	100	100	100	100	100	100
Day 21	0.001	0.001	0.003	0.003	0.001	0.013	0.007	0.117	0.003	0.003	0.007	0.009	0.073	0.11	0.108
Day 32	0.03	0.013	0.007	0.023	0.03	0.033	0.017	0.117	0.027	0.043	0.04	0.05	0.03	0.013	0.03
