# Supplementary material for: PEAR, a flexible fluorescent reporter for the identification and enrichment of successfully prime edited cells
Source: eLife. 2022 Feb 23;11:e69504. doi: 10.7554/eLife.69504 (PMC8865850; doi:10.7554/eLife.69504)
Supplement: Figure 3—source data 1. [file elife-69504-fig3-data1.xlsx]

## Sheet: figure 3a
Fig3a
	no enrichment			transfection enrichment			PEAR enrichment
pegRNA1	17.928	17.861	17.573	24.754	24.375	23.62	57.397	56.435	56.109
pegRNA2	17.744	17.927	16.326	24.009	24.332	22.465	76.808	76.949	75.33
	pegRNA1		pegRNA2
Tukey's multiple comparisons test	Summary	Adjusted P Value	Summary	Adjusted P Value
no enrichment vs. transfection enrichment	***	<0.001	***	<0.001
no enrichment vs. PEAR enrichment	***	<0.001	***	<0.001
transfection enrichment vs. PEAR enrichment	***	<0.001	***	<0.001

## Sheet: figure 3c
Fig3c
HEK293 edit	untransfected			no enrichment			transfection enrichment			PEAR enrichment
EMX1	0.21	0.18	0.21	9.03	8.26	8.84	12.15	14.28	14.25	27	36.96	40.45
RNF2	0.28	0.21	0.51	34.54	32.99	32	46.04	48.23	47.87	70.78	69.07	71.03
FANCF	0.16	0.19	0.17	31.44	30.45	38.09	52.79	52.45	56.64	78.08	73.01	78.71
HEK3	0.05	0.05	0.03	21.53	21.29	22.68	35.16	34.76	34.33	53.5	53.88	55.3
HEK4	0.25	0.28	0.24	7.13	6.47	7.36	9.51	9.86	5.46	18.56	10.11	16.98
	EMX1		RNF2		FANCF		HEK3		HEK4
	Box-Cox transformed (lambda = 0)
Tukey's multiple comparisons test	Summary	Adjusted P Value	Summary	Adjusted P Value	Summary	Adjusted P Value	Summary	Adjusted P Value	Summary	Adjusted P Value
untransfected cells vs. no enrichment	***	<0.001	***	<0.001	***	<0.001	***	<0.001	*	0.05
untransfected cells vs. transfection enrichment	***	<0.001	***	<0.001	***	<0.001	***	<0.001	*	0.02
untransfected cells vs. PEAR enrichment	***	<0.001	***	<0.001	***	<0.001	***	<0.001	***	<0.001
no enrichment vs. transfection enrichment	*	0.01	***	<0.001	***	<0.001	***	<0.001	ns	0.92
no enrichment vs. PEAR enrichment	***	<0.001	***	<0.001	***	<0.001	***	<0.001	*	0.02
transfection enrichment vs. PEAR enrichment	***	<0.001	***	<0.001	***	<0.001	***	<0.001	*	0.04
K562 edit
	untransfected			no enrichment			transfection enrichment			PEAR enrichment
EMX1	0.32	0.38	0.39	11.55	12.27	10.91	12.57	12.88	11.2	50.17	45.25	48.89
RNF2	0.26	0.24	0.22	25.17	20.24	19.58	26.36	22.05	21.62	57.94	47.65	54.84
FANCF	0.25	0.22	0.26	37.01	37.53	37.82	41.33	41.47	40.77	59.07	65.33	62.5
HEK3	0.12	0.12	0.1	13.11	12.39	13.52	14.62	13.03	14.74	33.83	35.29	36.62
	EMX1		RNF2		FANCF		HEK3
					Box-Cox transformed (lambda = 0.3)
Tukey's multiple comparisons test	Summary	Adjusted P Value	Summary	Adjusted P Value	Summary	Adjusted P Value	Summary	Adjusted P Value
untransfected cells vs. no enrichment	***	<0.001	***	<0.001	***	<0.001	***	<0.001
untransfected cells vs. transfection enrichment	***	<0.001	***	<0.001	***	<0.001	***	<0.001
untransfected cells vs. PEAR enrichment	***	<0.001	***	<0.001	***	<0.001	***	<0.001
no enrichment vs. transfection enrichment	ns	0.94	ns	0.92	*	0.02	ns	0.46
no enrichment vs. PEAR enrichment	***	<0.001	***	<0.001	***	<0.001	***	<0.001
transfection enrichment vs. PEAR enrichment	***	<0.001	***	<0.001	***	<0.001	***	<0.001
HUES9 edit
	untransfected			no enrichment			transfection enrichment			PEAR enrichment
FANCF	0.15	0.14	0.14	5.39	3.42	2.09	5.84	8.22	3.88	28.11	24.56	33.03
	FANCF
Tukey's multiple comparisons test	Summary	Adjusted P Value
untransfected cells vs. no enrichment	ns	0.39
untransfected cells vs. transfection enrichment	ns	0.08
untransfected cells vs. PEAR enrichment	***	<0.001
no enrichment vs. transfection enrichment	ns	0.68
no enrichment vs. PEAR enrichment	***	<0.001
transfection enrichment vs. PEAR enrichment	***	<0.001
U2OS edit
	untransfected			no enrichment			transfection enrichment			PEAR enrichment
EMX1	0.44	0.44	0.38	13.31	9.93	9.77	14.63	12.76	10.89	30.17	30.66	28.58
RNF2	0.13	0.16	0.11	22.46	19.5	21.86	20.59	19.47	20.95	31.17	32.84	31.16
HEK3	0.04	0.02	0.03	8.27	13.23	11.1	10.62	10.5	10.59	22.59	21.52	22.2
	EMX1		RNF2		HEK3
Tukey's multiple comparisons test	Summary	Adjusted P Value	Summary	Adjusted P Value	Summary	Adjusted P Value
untransfected cells vs. no enrichment	***	<0.001	***	<0.001	***	<0.001
untransfected cells vs. transfection enrichment	***	<0.001	***	<0.001	***	<0.001
untransfected cells vs. PEAR enrichment	***	<0.001	***	<0.001	***	<0.001
no enrichment vs. transfection enrichment	ns	0.5	ns	0.67	ns	>0.99
no enrichment vs. PEAR enrichment	***	<0.001	***	<0.001	***	<0.001
transfection enrichment vs. PEAR enrichment	***	<0.001	***	<0.001	***	<0.001
Fig3f
	untransfected			no enrichment			transfection enrichment			PEAR enrichment
EMX1-OT1	0.26	0.26	0.18	0.26	0.29	0.34	0.25	0.28	0.31	0.32	0.26	0.24
EMX1-OT2	0.3	0.36	0.27	0.29	0.34	0.32	0.3	0.31	0.27	0.36	0.33	0.32
EMX1-OT3	0.86	0.85	0.79	0.88	0.84	0.75	0.78	0.68	0.83	0.81	0.79	0.87
FANCF-OT1	1.05	1.08	1.1	1.06	1.14	1.14	1.21	1.12	1.03	1	1.2	1.2
FANCF-OT2	0.12	0.16	0.14	0.19	0.19	0.18	0.13	0.15	0.1	0.19	0.23	0.16
FANCF-OT3	0.56	0.57	0.54	0.54	0.63	0.6	0.61	0.58	0.54	0.61	0.64	0.62
FANCF-OT4	1.21	1.28	1.22	1.29	1.29	1.21	1.19	1.26	1.24	1.19	1.35	1.29
HEK3-OT1	0.14	0.2	0.18	0.2	0.22	0.18	0.17	0.21	0.18	0.2	0.23	0.21
HEK3-OT2	0.04	0.06	0.04	0.05	0.04	0.07	0.04	0.05	0.04	0.05	0.03	0.05
HEK3-OT3	0.25	0.24	0.22	0.21	0.24	0.18	0.25	0.26	0.22	0.24	0.21	0.24
HEK3-OT4	0.21	0.22	0.24	0.26	0.25	0.23	0.19	0.2	0.26	0.22	0.22	0.21
HEK4-OT1	0.17	0.2	0.19	0.1	0.06	0.34	0.1	0.27	0.11	0.08	0.14	0.03
HEK4-OT2	0.11	0.13	0.11	0.13	0.11	0.15	0.12	0.1	0.14	0.11	0.15	0.08
HEK4-OT3	0.05	0.06	0.03	0.3	0.82	0.86	1.32	1.22	1.28	2.48	1.2	2.04
HEK4-OT4	0.19	0.2	0.2	0.17	0.19	0.19	0.14	0.16	0.18	0.21	0.2	0.26
	EMX1-OT1		EMX1-OT2		EMX1-OT3		FANCF-OT1		FANCF-OT2		FANCF-OT3		FANCF-OT4		HEK3-OT1		HEK3-OT2		HEK3-OT3		HEK3-OT4		HEK4-OT1		HEK4-OT2		HEK4-OT3		HEK4-OT4
Tukey's / Dunn's multiple comparisons test	Summary	Adjusted P Value	Summary	Adjusted P Value	Summary	Adjusted P Value	Summary	Adjusted P Value	Summary	Adjusted P Value	Summary	Adjusted P Value	Summary	Adjusted P Value	Summary	Adjusted P Value	Summary	Adjusted P Value	Summary	Adjusted P Value	Summary	Adjusted P Value	Summary	Adjusted P Value	Summary	Adjusted P Value	Summary	Adjusted P Value	Summary	Adjusted P Value
untransfected cells vs. no enrichment	ns	0.29	ns	>0.99	ns	>0.99	ns	0.94	ns	0.16	ns	0.57	ns	0.93	ns	0.5	ns	0.89	ns	0.47	ns	0.59	ns	>0.99	ns	0.89	ns	0.24	ns	0.85
untransfected cells vs. transfection enrichment	ns	0.52	ns	0.9	ns	0.49	ns	0.9	ns	0.9	ns	0.85	ns	>0.99	ns	0.88	ns	0.98	ns	0.98	ns	0.98	ns	0.98	ns	>0.99	*	0.01	ns	0.19
untransfected cells vs. PEAR enrichment	ns	0.63	ns	0.71	ns	>0.99	ns	0.81	ns	0.1	ns	0.11	ns	0.8	ns	0.21	ns	0.98	ns	0.98	ns	0.98	ns	0.56	ns	>0.99	**	0.001	ns	0.41
no enrichment vs. transfection enrichment	ns	0.95	ns	0.78	ns	0.61	ns	>0.99	ns	0.06	ns	0.95	ns	0.87	ns	0.88	ns	0.72	ns	0.3	ns	0.4	ns	>0.99	ns	0.95	ns	0.24	ns	0.52
no enrichment vs. PEAR enrichment	ns	0.89	ns	0.85	ns	>0.99	ns	0.99	ns	0.99	ns	0.57	ns	0.99	ns	0.88	ns	0.72	ns	0.68	ns	0.4	ns	0.71	ns	0.82	*	0.01	ns	0.14
transfection enrichment vs. PEAR enrichment	ns	>0.99	ns	0.35	ns	0.61	ns	>0.99	*	0.04	ns	0.32	ns	0.72	ns	0.5	ns	>0.99	ns	0.87	ns	>0.99	ns	0.75	ns	0.98	ns	0.22	*	0.02
Fig3g
	untransfected			no enrichment			transfection enrichment			PEAR enrichment
EMX1-OT1	0.02	0.02	0.03	0.01	0.02	0.01	0.05	0.02	0.01	0.02	0.03	0.01
EMX1-OT2	0.01	0.02	0.01	0	0.02	0.01	0.01	0.03	0.01	0.02	0.01	0.01
EMX1-OT3	0	0.01	0.01	0	0.01	0.01	0.02	0	0.01	0	0	0.01
FANCF-OT1	0	0.01	0.01	0.02	0.01	0.03	0.01	0.02	0.01	0.02	0.01	0
FANCF-OT2	0	0.01	0	0	0	0.01	0.01	0.02	0	0	0.01	0.01
FANCF-OT3	0.01	0.01	0.02	0.01	0.02	0.01	0.01	0	0	0.02	0.01	0.01
FANCF-OT4	0.01	0	0.01	0	0.01	0.01	0.01	0.01	0.01	0.01	0.01	0.01
HEK3-OT1	0.01	0	0	0	0	0	0	0	0	0	0	0.01
HEK3-OT2	0.03	0.03	0.02	0.02	0.03	0.02	0	0.02	0.02	0.03	0.02	0.02
HEK3-OT3	0.65	0.77	0.79	0.94	1.1	0.78	0.87	1.19	0.8	1.02	0.59	0.01
HEK3-OT4	0.4	0.2	0.09	0.03	0.35	0.23	0.01	0.22	0.02	0.01	0.54	0.01
HEK4-OT1	1.14	1.6	0.2	1.13	0.61	0.76	0.65	1.64	0.63	0.28	0.14	1.44
HEK4-OT2	0.04	0.2	0.04	0.02	0.04	0.06	0.04	0.04	0.03	0.08	0.16	0.06
HEK4-OT3	0.17	0.14	0.11	0.39	0.93	0.25	0.43	1.09	1.05	1.05	0.8	1.42
HEK4-OT4	0.03	0.02	0.01	0.02	0.01	0.03	0.03	0.02	0.02	0.02	0.02	0.01
	EMX1-OT1		EMX1-OT2		EMX1-OT3		FANCF-OT1		FANCF-OT2		FANCF-OT3		FANCF-OT4		HEK3-OT1		HEK3-OT2		HEK3-OT3		HEK3-OT4		HEK4-OT1		HEK4-OT2		HEK4-OT3		HEK4-OT4
Tukey's / Dunn's multiple comparisons test	Summary	Adjusted P Value	Summary	Adjusted P Value	Summary	Adjusted P Value	Summary	Adjusted P Value	Summary	Adjusted P Value	Summary	Adjusted P Value	Summary	Adjusted P Value	Summary	Adjusted P Value	Summary	Adjusted P Value	Summary	Adjusted P Value	Summary	Adjusted P Value	Summary	Adjusted P Value	Summary	Adjusted P Value	Summary	Adjusted P Value	Summary	Adjusted P Value
untransfected cells vs. no enrichment	ns	0.75	ns	0.96	ns	>0.99	ns	0.26	ns	>0.99	ns	>0.99	ns	>0.99	ns	0.75	ns	0.95	ns	0.82	ns	>0.99	ns	0.99	ns	0.64	ns	0.45	ns	>0.99
untransfected cells vs. transfection enrichment	ns	0.99	ns	0.96	ns	0.94	ns	0.75	ns	0.67	ns	0.23	ns	0.75	ns	0.75	ns	0.22	ns	0.79	ns	0.8	ns	>0.99	ns	0.6	ns	0.08	ns	0.96
untransfected cells vs. PEAR enrichment	ns	0.99	ns	>0.99	ns	0.94	ns	0.96	ns	0.94	ns	>0.99	ns	0.75	ns	>0.99	ns	0.95	ns	0.84	ns	>0.99	ns	0.88	ns	>0.99	*	0.02	ns	0.96
no enrichment vs. transfection enrichment	ns	0.57	ns	0.78	ns	0.94	ns	0.75	ns	0.67	ns	0.23	ns	0.75	ns	>0.99	ns	0.43	ns	>0.99	ns	0.88	ns	>0.99	ns	>0.99	ns	0.56	ns	0.96
no enrichment vs. PEAR enrichment	ns	0.91	ns	0.96	ns	0.94	ns	0.48	ns	0.94	ns	>0.99	ns	0.75	ns	0.75	ns	>0.99	ns	0.38	ns	>0.99	ns	0.97	ns	0.56	ns	0.18	ns	0.96
transfection enrichment vs. PEAR enrichment	ns	0.91	ns	0.96	ns	0.67	ns	0.96	ns	0.94	ns	0.23	ns	>0.99	ns	0.75	ns	0.43	ns	0.36	ns	0.92	ns	0.88	ns	0.52	ns	0.78	ns	0.75

## Sheet: figure 3d
Fig3d
HEK293 indel
	untransfected			no enrichment			transfection enrichment			PEAR enrichment
EMX1	0.01	0.03	0.02	2.88	2.07	2.49	3.27	1.85	2.36	4.94	7.93	9.15
RNF2	0.04	0.03	0.03	1.11	1.13	1.2	1.92	1.72	1.91	3	2.8	3.07
FANCF	0.49	0.57	0.47	5.54	3.75	3.97	5.81	5.89	5.73	5.33	6.01	5.64
HEK3	0.02	0.01	0.01	10.96	9.73	9.25	11.91	12.24	12.12	13.5	14.62	14.68
HEK4	0.08	0.04	0.08	0.77	0.99	0.34	0.43	1.37	1.01	0.88	3.94	0.6
	EMX1		RNF2		FANCF		HEK3		HEK4
	Box-Cox transformed (lambda = 0)				Kruskal-Wallis test				Box-Cox transformed (lambda = -0.26)
Tukey's / Dunn's multiple comparisons test	Summary	Adjusted P Value	Summary	Adjusted P Value	Summary	Adjusted P Value	Summary	Adjusted P Value	Summary	Adjusted P Value
untransfected cells vs. no enrichment	***	<0.001	***	<0.001	ns	>0.99	***	<0.001	**	0.002
untransfected cells vs. transfection enrichment	***	<0.001	***	<0.001	*	0.04	***	<0.001	**	0.001
untransfected cells vs. PEAR enrichment	***	<0.001	***	<0.001	ns	0.14	***	<0.001	***	<0.001
no enrichment vs. transfection enrichment	ns	>0.99	***	<0.001	ns	0.68	**	0.007	ns	0.96
no enrichment vs. PEAR enrichment	*	0.03	***	<0.001	ns	>0.99	***	<0.001	ns	0.72
transfection enrichment vs. PEAR enrichment	*	0.03	***	<0.001	ns	>0.99	**	0.006	ns	0.93
K562 indel
	untransfected			no enrichment			transfection enrichment			PEAR enrichment
EMX1	0.03	0.02	0.02	1.63	1.68	1.47	2.82	2.05	1.73	6.23	5.42	7.1
RNF2	0.01	0.01	0.02	1.24	0.84	0.98	1.18	1.1	0.8	3.65	1.79	2.19
FANCF	1.61	1.37	1.77	7.34	7.06	5.97	7.29	7.27	6.74	7.84	9.08	9.5
HEK3	0.01	0.01	0	5.89	5.2	6.69	6.57	5.71	6.47	7.55	7.96	9.45
	EMX1		RNF2		FANCF		HEK3
			Box-Cox transformed (lambda = 0)
Tukey's multiple comparisons test	Summary	Adjusted P Value	Summary	Adjusted P Value	Summary	Adjusted P Value	Summary	Adjusted P Value
untransfected cells vs. no enrichment	*	0.02	***	<0.001	***	<0.001	***	<0.001
untransfected cells vs. transfection enrichment	**	0.003	***	<0.001	***	<0.001	***	<0.001
untransfected cells vs. PEAR enrichment	***	<0.001	***	<0.001	***	<0.001	***	<0.001
no enrichment vs. transfection enrichment	ns	0.5	ns	>0.99	ns	0.92	ns	0.93
no enrichment vs. PEAR enrichment	***	<0.001	*	0.03	*	0.01	**	0.01
transfection enrichment vs. PEAR enrichment	***	<0.001	*	0.03	*	0.03	*	0.02
HUES9 indel
	untransfected			no enrichment			transfection enrichment			PEAR enrichment
FANCF	1.18	1.76	0.17	17.91	10.93	7.27	25.9	12.07	7.89	18.01	21.68	12.88
	FANCF
Tukey's multiple comparisons test	Summary	Adjusted P Value
untransfected cells vs. no enrichment	ns	0.18
untransfected cells vs. transfection enrichment	ns	0.07
untransfected cells vs. PEAR enrichment	*	0.04
no enrichment vs. transfection enrichment	ns	0.9
no enrichment vs. PEAR enrichment	ns	0.68
transfection enrichment vs. PEAR enrichment	ns	0.96
U2OS indel
	untransfected			no enrichment			transfection enrichment			PEAR enrichment
EMX1	0.04	0.04	0.02	3.11	6.94	1.2	2.2	1.4	0.66	4.09	3.52	5.5
RNF2	0.01	0.01	0.01	0.29	0.79	1.29	0.71	0.86	0.41	1.45	1.07	1.72
HEK3	0.01	0.01	0	1.37	0.88	2.34	0.36	0.01	0.12	2.68	1.56	5.8
	EMX1		RNF2		HEK3
					Box-Cox transformed (lambda = 0)
Tukey's multiple comparisons test	Summary	Adjusted P Value	Summary	Adjusted P Value	Summary	Adjusted P Value
untransfected cells vs. no enrichment	ns	0.08	ns	0.07	**	0.006
untransfected cells vs. transfection enrichment	ns	0.72	ns	0.14	ns	0.25
untransfected cells vs. PEAR enrichment	*	0.04	**	0.003	**	0.003
no enrichment vs. transfection enrichment	ns	0.34	ns	0.96	*	0.05
no enrichment vs. PEAR enrichment	ns	0.96	ns	0.16	ns	0.84
transfection enrichment vs. PEAR enrichment	ns	0.19	ns	0.08	*	0.02
Fig3f
	untransfected			no enrichment			transfection enrichment			PEAR enrichment
EMX1-OT1	0.26	0.26	0.18	0.26	0.29	0.34	0.25	0.28	0.31	0.32	0.26	0.24
EMX1-OT2	0.3	0.36	0.27	0.29	0.34	0.32	0.3	0.31	0.27	0.36	0.33	0.32
EMX1-OT3	0.86	0.85	0.79	0.88	0.84	0.75	0.78	0.68	0.83	0.81	0.79	0.87
FANCF-OT1	1.05	1.08	1.1	1.06	1.14	1.14	1.21	1.12	1.03	1	1.2	1.2
FANCF-OT2	0.12	0.16	0.14	0.19	0.19	0.18	0.13	0.15	0.1	0.19	0.23	0.16
FANCF-OT3	0.56	0.57	0.54	0.54	0.63	0.6	0.61	0.58	0.54	0.61	0.64	0.62
FANCF-OT4	1.21	1.28	1.22	1.29	1.29	1.21	1.19	1.26	1.24	1.19	1.35	1.29
HEK3-OT1	0.14	0.2	0.18	0.2	0.22	0.18	0.17	0.21	0.18	0.2	0.23	0.21
HEK3-OT2	0.04	0.06	0.04	0.05	0.04	0.07	0.04	0.05	0.04	0.05	0.03	0.05
HEK3-OT3	0.25	0.24	0.22	0.21	0.24	0.18	0.25	0.26	0.22	0.24	0.21	0.24
HEK3-OT4	0.21	0.22	0.24	0.26	0.25	0.23	0.19	0.2	0.26	0.22	0.22	0.21
HEK4-OT1	0.17	0.2	0.19	0.1	0.06	0.34	0.1	0.27	0.11	0.08	0.14	0.03
HEK4-OT2	0.11	0.13	0.11	0.13	0.11	0.15	0.12	0.1	0.14	0.11	0.15	0.08
HEK4-OT3	0.05	0.06	0.03	0.3	0.82	0.86	1.32	1.22	1.28	2.48	1.2	2.04
HEK4-OT4	0.19	0.2	0.2	0.17	0.19	0.19	0.14	0.16	0.18	0.21	0.2	0.26
	EMX1-OT1		EMX1-OT2		EMX1-OT3		FANCF-OT1		FANCF-OT2		FANCF-OT3		FANCF-OT4		HEK3-OT1		HEK3-OT2		HEK3-OT3		HEK3-OT4		HEK4-OT1		HEK4-OT2		HEK4-OT3		HEK4-OT4
Tukey's / Dunn's multiple comparisons test	Summary	Adjusted P Value	Summary	Adjusted P Value	Summary	Adjusted P Value	Summary	Adjusted P Value	Summary	Adjusted P Value	Summary	Adjusted P Value	Summary	Adjusted P Value	Summary	Adjusted P Value	Summary	Adjusted P Value	Summary	Adjusted P Value	Summary	Adjusted P Value	Summary	Adjusted P Value	Summary	Adjusted P Value	Summary	Adjusted P Value	Summary	Adjusted P Value
untransfected cells vs. no enrichment	ns	0.29	ns	>0.99	ns	>0.99	ns	0.94	ns	0.16	ns	0.57	ns	0.93	ns	0.5	ns	0.89	ns	0.47	ns	0.59	ns	>0.99	ns	0.89	ns	0.24	ns	0.85
untransfected cells vs. transfection enrichment	ns	0.52	ns	0.9	ns	0.49	ns	0.9	ns	0.9	ns	0.85	ns	>0.99	ns	0.88	ns	0.98	ns	0.98	ns	0.98	ns	0.98	ns	>0.99	*	0.01	ns	0.19
untransfected cells vs. PEAR enrichment	ns	0.63	ns	0.71	ns	>0.99	ns	0.81	ns	0.1	ns	0.11	ns	0.8	ns	0.21	ns	0.98	ns	0.98	ns	0.98	ns	0.56	ns	>0.99	**	0.001	ns	0.41
no enrichment vs. transfection enrichment	ns	0.95	ns	0.78	ns	0.61	ns	>0.99	ns	0.06	ns	0.95	ns	0.87	ns	0.88	ns	0.72	ns	0.3	ns	0.4	ns	>0.99	ns	0.95	ns	0.24	ns	0.52
no enrichment vs. PEAR enrichment	ns	0.89	ns	0.85	ns	>0.99	ns	0.99	ns	0.99	ns	0.57	ns	0.99	ns	0.88	ns	0.72	ns	0.68	ns	0.4	ns	0.71	ns	0.82	*	0.01	ns	0.14
transfection enrichment vs. PEAR enrichment	ns	>0.99	ns	0.35	ns	0.61	ns	>0.99	*	0.04	ns	0.32	ns	0.72	ns	0.5	ns	>0.99	ns	0.87	ns	>0.99	ns	0.75	ns	0.98	ns	0.22	*	0.02
Fig3g
	untransfected			no enrichment			transfection enrichment			PEAR enrichment
EMX1-OT1	0.02	0.02	0.03	0.01	0.02	0.01	0.05	0.02	0.01	0.02	0.03	0.01
EMX1-OT2	0.01	0.02	0.01	0	0.02	0.01	0.01	0.03	0.01	0.02	0.01	0.01
EMX1-OT3	0	0.01	0.01	0	0.01	0.01	0.02	0	0.01	0	0	0.01
FANCF-OT1	0	0.01	0.01	0.02	0.01	0.03	0.01	0.02	0.01	0.02	0.01	0
FANCF-OT2	0	0.01	0	0	0	0.01	0.01	0.02	0	0	0.01	0.01
FANCF-OT3	0.01	0.01	0.02	0.01	0.02	0.01	0.01	0	0	0.02	0.01	0.01
FANCF-OT4	0.01	0	0.01	0	0.01	0.01	0.01	0.01	0.01	0.01	0.01	0.01
HEK3-OT1	0.01	0	0	0	0	0	0	0	0	0	0	0.01
HEK3-OT2	0.03	0.03	0.02	0.02	0.03	0.02	0	0.02	0.02	0.03	0.02	0.02
HEK3-OT3	0.65	0.77	0.79	0.94	1.1	0.78	0.87	1.19	0.8	1.02	0.59	0.01
HEK3-OT4	0.4	0.2	0.09	0.03	0.35	0.23	0.01	0.22	0.02	0.01	0.54	0.01
HEK4-OT1	1.14	1.6	0.2	1.13	0.61	0.76	0.65	1.64	0.63	0.28	0.14	1.44
HEK4-OT2	0.04	0.2	0.04	0.02	0.04	0.06	0.04	0.04	0.03	0.08	0.16	0.06
HEK4-OT3	0.17	0.14	0.11	0.39	0.93	0.25	0.43	1.09	1.05	1.05	0.8	1.42
HEK4-OT4	0.03	0.02	0.01	0.02	0.01	0.03	0.03	0.02	0.02	0.02	0.02	0.01
	EMX1-OT1		EMX1-OT2		EMX1-OT3		FANCF-OT1		FANCF-OT2		FANCF-OT3		FANCF-OT4		HEK3-OT1		HEK3-OT2		HEK3-OT3		HEK3-OT4		HEK4-OT1		HEK4-OT2		HEK4-OT3		HEK4-OT4
Tukey's / Dunn's multiple comparisons test	Summary	Adjusted P Value	Summary	Adjusted P Value	Summary	Adjusted P Value	Summary	Adjusted P Value	Summary	Adjusted P Value	Summary	Adjusted P Value	Summary	Adjusted P Value	Summary	Adjusted P Value	Summary	Adjusted P Value	Summary	Adjusted P Value	Summary	Adjusted P Value	Summary	Adjusted P Value	Summary	Adjusted P Value	Summary	Adjusted P Value	Summary	Adjusted P Value
untransfected cells vs. no enrichment	ns	0.75	ns	0.96	ns	>0.99	ns	0.26	ns	>0.99	ns	>0.99	ns	>0.99	ns	0.75	ns	0.95	ns	0.82	ns	>0.99	ns	0.99	ns	0.64	ns	0.45	ns	>0.99
untransfected cells vs. transfection enrichment	ns	0.99	ns	0.96	ns	0.94	ns	0.75	ns	0.67	ns	0.23	ns	0.75	ns	0.75	ns	0.22	ns	0.79	ns	0.8	ns	>0.99	ns	0.6	ns	0.08	ns	0.96
untransfected cells vs. PEAR enrichment	ns	0.99	ns	>0.99	ns	0.94	ns	0.96	ns	0.94	ns	>0.99	ns	0.75	ns	>0.99	ns	0.95	ns	0.84	ns	>0.99	ns	0.88	ns	>0.99	*	0.02	ns	0.96
no enrichment vs. transfection enrichment	ns	0.57	ns	0.78	ns	0.94	ns	0.75	ns	0.67	ns	0.23	ns	0.75	ns	>0.99	ns	0.43	ns	>0.99	ns	0.88	ns	>0.99	ns	>0.99	ns	0.56	ns	0.96
no enrichment vs. PEAR enrichment	ns	0.91	ns	0.96	ns	0.94	ns	0.48	ns	0.94	ns	>0.99	ns	0.75	ns	0.75	ns	>0.99	ns	0.38	ns	>0.99	ns	0.97	ns	0.56	ns	0.18	ns	0.96
transfection enrichment vs. PEAR enrichment	ns	0.91	ns	0.96	ns	0.67	ns	0.96	ns	0.94	ns	0.23	ns	>0.99	ns	0.75	ns	0.43	ns	0.36	ns	0.92	ns	0.88	ns	0.52	ns	0.78	ns	0.75

## Sheet: figure 3e
Fig3e
HEK293 specificity	no enrichment			transfection enrichment			PEAR enrichment
EMX1	3.13542	3.99034	3.5502	3.7156	7.71892	6.03814	5.46559	4.66078	4.42077
RNF2	31.1171	29.1947	26.6667	23.9792	28.0407	25.0628	23.5933	24.6679	23.1368
FANCF	5.67509	8.12	9.59446	9.08606	8.90492	9.88482	14.6492	12.1481	13.9557
HEK3	1.96442	2.18808	2.45189	2.95214	2.83987	2.83251	3.96296	3.68536	3.76703
HEK4	9.25974	6.53535	21.6471	22.1163	7.19708	5.40594	21.0909	2.56599	28.3
	EMX1		RNF2		FANCF		HEK3		HEK4
Tukey's multiple comparisons test
no enrichment vs. transfection enrichment	ns	0.14	ns	0.15	ns	0.44	**	0.006	ns	>0,99
no enrichment vs. PEAR enrichment	ns	0.45	*	0.03	**	0.005	***	<0,001	ns	0.84
transfection enrichment vs. PEAR enrichment	ns	0.62	ns	0.46	*	0.02	**	0.001	ns	0.79
K562 specificity	no enrichment			transfection enrichment			PEAR enrichment
EMX1	7.08589	7.30357	7.42177	4.45745	6.28293	6.47399	8.05297	8.34871	6.88591
RNF2	20.2984	24.0952	19.9796	22.339	20.0454	27.025	15.874	26.6201	25.0411
FANCF	5.04223	5.31586	6.33501	5.66941	5.70426	6.04896	7.53444	7.19493	6.57895
HEK3	2.22581	2.38269	2.02093	2.22527	2.28196	2.27821	4.48079	4.43342	3.87513
	EMX1		RNF2		FANCF		HEK3
Tukey's multiple comparisons test	Summary	Adjusted P Value	Summary	Adjusted P Value	Summary	Adjusted P Value	Summary	Adjusted P Value
no enrichment vs. transfection enrichment	ns	0.12	ns	0.8759	ns	0.83	ns	0.96
no enrichment vs. PEAR enrichment	ns	0.74	ns	0.9484	*	0.02	***	<0,001
transfection enrichment vs. PEAR enrichment	*	0.05	ns	0.9815	*	0.04	***	<0,001
U2OS specificity	no enrichment			transfection enrichment			PEAR enrichment
EMX1	4.27974	1.43084	8.14167	6.65	9.11429	16.5	7.37653	8.71023	5.19636
RNF2	77.4483	24.6835	16.9457	29	22.6395	51.0976	21.4965	30.6916	18.1163
HEK3	9.56934	14.0795	5.77778	40.6111	260.6	122.833	12.6231	22.6218	6.31379
	EMX1		RNF2		HEK3
Tukey's multiple comparisons test	Summary	Adjusted P Value	Summary	Adjusted P Value	Summary	Adjusted P Value
no enrichment vs. transfection enrichment	ns	0.18	ns	0.95	ns	0.1
no enrichment vs. PEAR enrichment	ns	0.7	ns	0.64	ns	>0,99
transfection enrichment vs. PEAR enrichment	ns	0.49	ns	0.81	ns	0.11
HUES9 specificity	no enrichment			transfection enrichment			PEAR enrichment
FANCF	1.73312	0.492795	1.74167	2.65455	5.87143	5.87879	6.87286	6.97727	6.00546
	FANCF
Tukey's multiple comparisons test	Summary	Adjusted P Value
no enrichment vs. transfection enrichment	*	0.03
no enrichment vs. PEAR enrichment	**	0.004
transfection enrichment vs. PEAR enrichment	ns	0.23
Fig3f
	untransfected			no enrichment			transfection enrichment			PEAR enrichment
EMX1-OT1	0.26	0.26	0.18	0.26	0.29	0.34	0.25	0.28	0.31	0.32	0.26	0.24
EMX1-OT2	0.3	0.36	0.27	0.29	0.34	0.32	0.3	0.31	0.27	0.36	0.33	0.32
EMX1-OT3	0.86	0.85	0.79	0.88	0.84	0.75	0.78	0.68	0.83	0.81	0.79	0.87
FANCF-OT1	1.05	1.08	1.1	1.06	1.14	1.14	1.21	1.12	1.03	1	1.2	1.2
FANCF-OT2	0.12	0.16	0.14	0.19	0.19	0.18	0.13	0.15	0.1	0.19	0.23	0.16
FANCF-OT3	0.56	0.57	0.54	0.54	0.63	0.6	0.61	0.58	0.54	0.61	0.64	0.62
FANCF-OT4	1.21	1.28	1.22	1.29	1.29	1.21	1.19	1.26	1.24	1.19	1.35	1.29
HEK3-OT1	0.14	0.2	0.18	0.2	0.22	0.18	0.17	0.21	0.18	0.2	0.23	0.21
HEK3-OT2	0.04	0.06	0.04	0.05	0.04	0.07	0.04	0.05	0.04	0.05	0.03	0.05
HEK3-OT3	0.25	0.24	0.22	0.21	0.24	0.18	0.25	0.26	0.22	0.24	0.21	0.24
HEK3-OT4	0.21	0.22	0.24	0.26	0.25	0.23	0.19	0.2	0.26	0.22	0.22	0.21
HEK4-OT1	0.17	0.2	0.19	0.1	0.06	0.34	0.1	0.27	0.11	0.08	0.14	0.03
HEK4-OT2	0.11	0.13	0.11	0.13	0.11	0.15	0.12	0.1	0.14	0.11	0.15	0.08
HEK4-OT3	0.05	0.06	0.03	0.3	0.82	0.86	1.32	1.22	1.28	2.48	1.2	2.04
HEK4-OT4	0.19	0.2	0.2	0.17	0.19	0.19	0.14	0.16	0.18	0.21	0.2	0.26
	EMX1-OT1		EMX1-OT2		EMX1-OT3		FANCF-OT1		FANCF-OT2		FANCF-OT3		FANCF-OT4		HEK3-OT1		HEK3-OT2		HEK3-OT3		HEK3-OT4		HEK4-OT1		HEK4-OT2		HEK4-OT3		HEK4-OT4
Tukey's / Dunn's multiple comparisons test	Summary	Adjusted P Value	Summary	Adjusted P Value	Summary	Adjusted P Value	Summary	Adjusted P Value	Summary	Adjusted P Value	Summary	Adjusted P Value	Summary	Adjusted P Value	Summary	Adjusted P Value	Summary	Adjusted P Value	Summary	Adjusted P Value	Summary	Adjusted P Value	Summary	Adjusted P Value	Summary	Adjusted P Value	Summary	Adjusted P Value	Summary	Adjusted P Value
untransfected cells vs. no enrichment	ns	0.29	ns	>0.99	ns	>0.99	ns	0.94	ns	0.16	ns	0.57	ns	0.93	ns	0.5	ns	0.89	ns	0.47	ns	0.59	ns	>0.99	ns	0.89	ns	0.24	ns	0.85
untransfected cells vs. transfection enrichment	ns	0.52	ns	0.9	ns	0.49	ns	0.9	ns	0.9	ns	0.85	ns	>0.99	ns	0.88	ns	0.98	ns	0.98	ns	0.98	ns	0.98	ns	>0.99	*	0.01	ns	0.19
untransfected cells vs. PEAR enrichment	ns	0.63	ns	0.71	ns	>0.99	ns	0.81	ns	0.1	ns	0.11	ns	0.8	ns	0.21	ns	0.98	ns	0.98	ns	0.98	ns	0.56	ns	>0.99	**	0.001	ns	0.41
no enrichment vs. transfection enrichment	ns	0.95	ns	0.78	ns	0.61	ns	>0.99	ns	0.06	ns	0.95	ns	0.87	ns	0.88	ns	0.72	ns	0.3	ns	0.4	ns	>0.99	ns	0.95	ns	0.24	ns	0.52
no enrichment vs. PEAR enrichment	ns	0.89	ns	0.85	ns	>0.99	ns	0.99	ns	0.99	ns	0.57	ns	0.99	ns	0.88	ns	0.72	ns	0.68	ns	0.4	ns	0.71	ns	0.82	*	0.01	ns	0.14
transfection enrichment vs. PEAR enrichment	ns	>0.99	ns	0.35	ns	0.61	ns	>0.99	*	0.04	ns	0.32	ns	0.72	ns	0.5	ns	>0.99	ns	0.87	ns	>0.99	ns	0.75	ns	0.98	ns	0.22	*	0.02
Fig3g
	untransfected			no enrichment			transfection enrichment			PEAR enrichment
EMX1-OT1	0.02	0.02	0.03	0.01	0.02	0.01	0.05	0.02	0.01	0.02	0.03	0.01
EMX1-OT2	0.01	0.02	0.01	0	0.02	0.01	0.01	0.03	0.01	0.02	0.01	0.01
EMX1-OT3	0	0.01	0.01	0	0.01	0.01	0.02	0	0.01	0	0	0.01
FANCF-OT1	0	0.01	0.01	0.02	0.01	0.03	0.01	0.02	0.01	0.02	0.01	0
FANCF-OT2	0	0.01	0	0	0	0.01	0.01	0.02	0	0	0.01	0.01
FANCF-OT3	0.01	0.01	0.02	0.01	0.02	0.01	0.01	0	0	0.02	0.01	0.01
FANCF-OT4	0.01	0	0.01	0	0.01	0.01	0.01	0.01	0.01	0.01	0.01	0.01
HEK3-OT1	0.01	0	0	0	0	0	0	0	0	0	0	0.01
HEK3-OT2	0.03	0.03	0.02	0.02	0.03	0.02	0	0.02	0.02	0.03	0.02	0.02
HEK3-OT3	0.65	0.77	0.79	0.94	1.1	0.78	0.87	1.19	0.8	1.02	0.59	0.01
HEK3-OT4	0.4	0.2	0.09	0.03	0.35	0.23	0.01	0.22	0.02	0.01	0.54	0.01
HEK4-OT1	1.14	1.6	0.2	1.13	0.61	0.76	0.65	1.64	0.63	0.28	0.14	1.44
HEK4-OT2	0.04	0.2	0.04	0.02	0.04	0.06	0.04	0.04	0.03	0.08	0.16	0.06
HEK4-OT3	0.17	0.14	0.11	0.39	0.93	0.25	0.43	1.09	1.05	1.05	0.8	1.42
HEK4-OT4	0.03	0.02	0.01	0.02	0.01	0.03	0.03	0.02	0.02	0.02	0.02	0.01
	EMX1-OT1		EMX1-OT2		EMX1-OT3		FANCF-OT1		FANCF-OT2		FANCF-OT3		FANCF-OT4		HEK3-OT1		HEK3-OT2		HEK3-OT3		HEK3-OT4		HEK4-OT1		HEK4-OT2		HEK4-OT3		HEK4-OT4
Tukey's / Dunn's multiple comparisons test	Summary	Adjusted P Value	Summary	Adjusted P Value	Summary	Adjusted P Value	Summary	Adjusted P Value	Summary	Adjusted P Value	Summary	Adjusted P Value	Summary	Adjusted P Value	Summary	Adjusted P Value	Summary	Adjusted P Value	Summary	Adjusted P Value	Summary	Adjusted P Value	Summary	Adjusted P Value	Summary	Adjusted P Value	Summary	Adjusted P Value	Summary	Adjusted P Value
untransfected cells vs. no enrichment	ns	0.75	ns	0.96	ns	>0.99	ns	0.26	ns	>0.99	ns	>0.99	ns	>0.99	ns	0.75	ns	0.95	ns	0.82	ns	>0.99	ns	0.99	ns	0.64	ns	0.45	ns	>0.99
untransfected cells vs. transfection enrichment	ns	0.99	ns	0.96	ns	0.94	ns	0.75	ns	0.67	ns	0.23	ns	0.75	ns	0.75	ns	0.22	ns	0.79	ns	0.8	ns	>0.99	ns	0.6	ns	0.08	ns	0.96
untransfected cells vs. PEAR enrichment	ns	0.99	ns	>0.99	ns	0.94	ns	0.96	ns	0.94	ns	>0.99	ns	0.75	ns	>0.99	ns	0.95	ns	0.84	ns	>0.99	ns	0.88	ns	>0.99	*	0.02	ns	0.96
no enrichment vs. transfection enrichment	ns	0.57	ns	0.78	ns	0.94	ns	0.75	ns	0.67	ns	0.23	ns	0.75	ns	>0.99	ns	0.43	ns	>0.99	ns	0.88	ns	>0.99	ns	>0.99	ns	0.56	ns	0.96
no enrichment vs. PEAR enrichment	ns	0.91	ns	0.96	ns	0.94	ns	0.48	ns	0.94	ns	>0.99	ns	0.75	ns	0.75	ns	>0.99	ns	0.38	ns	>0.99	ns	0.97	ns	0.56	ns	0.18	ns	0.96
transfection enrichment vs. PEAR enrichment	ns	0.91	ns	0.96	ns	0.67	ns	0.96	ns	0.94	ns	0.23	ns	>0.99	ns	0.75	ns	0.43	ns	0.36	ns	0.92	ns	0.88	ns	0.52	ns	0.78	ns	0.75

## Sheet: figure 3f
Fig3f
	untransfected			no enrichment			transfection enrichment			PEAR enrichment
EMX1-OT1	0.26	0.26	0.18	0.26	0.29	0.34	0.25	0.28	0.31	0.32	0.26	0.24
EMX1-OT2	0.3	0.36	0.27	0.29	0.34	0.32	0.3	0.31	0.27	0.36	0.33	0.32
EMX1-OT3	0.86	0.85	0.79	0.88	0.84	0.75	0.78	0.68	0.83	0.81	0.79	0.87
FANCF-OT1	1.05	1.08	1.1	1.06	1.14	1.14	1.21	1.12	1.03	1	1.2	1.2
FANCF-OT2	0.12	0.16	0.14	0.19	0.19	0.18	0.13	0.15	0.1	0.19	0.23	0.16
FANCF-OT3	0.56	0.57	0.54	0.54	0.63	0.6	0.61	0.58	0.54	0.61	0.64	0.62
FANCF-OT4	1.21	1.28	1.22	1.29	1.29	1.21	1.19	1.26	1.24	1.19	1.35	1.29
HEK3-OT1	0.14	0.2	0.18	0.2	0.22	0.18	0.17	0.21	0.18	0.2	0.23	0.21
HEK3-OT2	0.04	0.06	0.04	0.05	0.04	0.07	0.04	0.05	0.04	0.05	0.03	0.05
HEK3-OT3	0.25	0.24	0.22	0.21	0.24	0.18	0.25	0.26	0.22	0.24	0.21	0.24
HEK3-OT4	0.21	0.22	0.24	0.26	0.25	0.23	0.19	0.2	0.26	0.22	0.22	0.21
HEK4-OT1	0.17	0.2	0.19	0.1	0.06	0.34	0.1	0.27	0.11	0.08	0.14	0.03
HEK4-OT2	0.11	0.13	0.11	0.13	0.11	0.15	0.12	0.1	0.14	0.11	0.15	0.08
HEK4-OT3	0.05	0.06	0.03	0.3	0.82	0.86	1.32	1.22	1.28	2.48	1.2	2.04
HEK4-OT4	0.19	0.2	0.2	0.17	0.19	0.19	0.14	0.16	0.18	0.21	0.2	0.26
	EMX1-OT1		EMX1-OT2		EMX1-OT3		FANCF-OT1		FANCF-OT2		FANCF-OT3		FANCF-OT4		HEK3-OT1		HEK3-OT2		HEK3-OT3		HEK3-OT4		HEK4-OT1		HEK4-OT2		HEK4-OT3		HEK4-OT4
Tukey's multiple comparisons test	Summary	Adjusted P Value	Summary	Adjusted P Value	Summary	Adjusted P Value	Summary	Adjusted P Value	Summary	Adjusted P Value	Summary	Adjusted P Value	Summary	Adjusted P Value	Summary	Adjusted P Value	Summary	Adjusted P Value	Summary	Adjusted P Value	Summary	Adjusted P Value	Summary	Adjusted P Value	Summary	Adjusted P Value	Summary	Adjusted P Value	Summary	Adjusted P Value
untransfected cells vs. no enrichment	ns	0.2855	ns	0.9924	ns	0.9964	ns	0.9361	ns	0.1579	ns	0.5741	ns	0.9255	ns	0.5006	ns	0.8915	ns	0.474	ns	0.5878	ns	0.9933	ns	0.8936	ns	0.2389	ns	0.8452
untransfected cells vs. transfection enrichment	ns	0.5174	ns	0.9017	ns	0.4907	ns	0.901	ns	0.9015	ns	0.855	ns	0.9986	ns	0.8823	ns	0.9838	ns	0.9803	ns	0.9813	ns	0.9845	ns	0.9979	*	0.0136	ns	0.1907
untransfected cells vs. PEAR enrichment	ns	0.6298	ns	0.7057	ns	0.9964	ns	0.8092	ns	0.0982	ns	0.1091	ns	0.7966	ns	0.2053	ns	0.9838	ns	0.9803	ns	0.9813	ns	0.5617	ns	0.9979	**	0.0011	ns	0.4141
no enrichment vs. transfection enrichment	ns	0.9543	ns	0.7787	ns	0.6055	ns	0.9995	ns	0.0607	ns	0.9494	ns	0.868	ns	0.8823	ns	0.7211	ns	0.3039	ns	0.3962	ns	0.9997	ns	0.9503	ns	0.2389	ns	0.5174
no enrichment vs. PEAR enrichment	ns	0.8887	ns	0.8452	ns	>0,9999	ns	0.9884	ns	0.9854	ns	0.5741	ns	0.9893	ns	0.8823	ns	0.7211	ns	0.6806	ns	0.3962	ns	0.7069	ns	0.8167	*	0.0124	ns	0.1442
transfection enrichment vs. PEAR enrichment	ns	0.9967	ns	0.3527	ns	0.6055	ns	0.9965	*	0.0376	ns	0.3177	ns	0.7156	ns	0.5006	ns	>0,9999	ns	0.8718	ns	>0,9999	ns	0.7541	ns	0.9841	ns	0.2184	*	0.0196
Fig3f
	untransfected			no enrichment			transfection enrichment			PEAR enrichment
EMX1-OT1	0.26	0.26	0.18	0.26	0.29	0.34	0.25	0.28	0.31	0.32	0.26	0.24
EMX1-OT2	0.3	0.36	0.27	0.29	0.34	0.32	0.3	0.31	0.27	0.36	0.33	0.32
EMX1-OT3	0.86	0.85	0.79	0.88	0.84	0.75	0.78	0.68	0.83	0.81	0.79	0.87
FANCF-OT1	1.05	1.08	1.1	1.06	1.14	1.14	1.21	1.12	1.03	1	1.2	1.2
FANCF-OT2	0.12	0.16	0.14	0.19	0.19	0.18	0.13	0.15	0.1	0.19	0.23	0.16
FANCF-OT3	0.56	0.57	0.54	0.54	0.63	0.6	0.61	0.58	0.54	0.61	0.64	0.62
FANCF-OT4	1.21	1.28	1.22	1.29	1.29	1.21	1.19	1.26	1.24	1.19	1.35	1.29
HEK3-OT1	0.14	0.2	0.18	0.2	0.22	0.18	0.17	0.21	0.18	0.2	0.23	0.21
HEK3-OT2	0.04	0.06	0.04	0.05	0.04	0.07	0.04	0.05	0.04	0.05	0.03	0.05
HEK3-OT3	0.25	0.24	0.22	0.21	0.24	0.18	0.25	0.26	0.22	0.24	0.21	0.24
HEK3-OT4	0.21	0.22	0.24	0.26	0.25	0.23	0.19	0.2	0.26	0.22	0.22	0.21
HEK4-OT1	0.17	0.2	0.19	0.1	0.06	0.34	0.1	0.27	0.11	0.08	0.14	0.03
HEK4-OT2	0.11	0.13	0.11	0.13	0.11	0.15	0.12	0.1	0.14	0.11	0.15	0.08
HEK4-OT3	0.05	0.06	0.03	0.3	0.82	0.86	1.32	1.22	1.28	2.48	1.2	2.04
HEK4-OT4	0.19	0.2	0.2	0.17	0.19	0.19	0.14	0.16	0.18	0.21	0.2	0.26
	EMX1-OT1		EMX1-OT2		EMX1-OT3		FANCF-OT1		FANCF-OT2		FANCF-OT3		FANCF-OT4		HEK3-OT1		HEK3-OT2		HEK3-OT3		HEK3-OT4		HEK4-OT1		HEK4-OT2		HEK4-OT3		HEK4-OT4
Tukey's / Dunn's multiple comparisons test	Summary	Adjusted P Value	Summary	Adjusted P Value	Summary	Adjusted P Value	Summary	Adjusted P Value	Summary	Adjusted P Value	Summary	Adjusted P Value	Summary	Adjusted P Value	Summary	Adjusted P Value	Summary	Adjusted P Value	Summary	Adjusted P Value	Summary	Adjusted P Value	Summary	Adjusted P Value	Summary	Adjusted P Value	Summary	Adjusted P Value	Summary	Adjusted P Value
untransfected cells vs. no enrichment	ns	0.29	ns	>0.99	ns	>0.99	ns	0.94	ns	0.16	ns	0.57	ns	0.93	ns	0.5	ns	0.89	ns	0.47	ns	0.59	ns	>0.99	ns	0.89	ns	0.24	ns	0.85
untransfected cells vs. transfection enrichment	ns	0.52	ns	0.9	ns	0.49	ns	0.9	ns	0.9	ns	0.85	ns	>0.99	ns	0.88	ns	0.98	ns	0.98	ns	0.98	ns	0.98	ns	>0.99	*	0.01	ns	0.19
untransfected cells vs. PEAR enrichment	ns	0.63	ns	0.71	ns	>0.99	ns	0.81	ns	0.1	ns	0.11	ns	0.8	ns	0.21	ns	0.98	ns	0.98	ns	0.98	ns	0.56	ns	>0.99	**	0.001	ns	0.41
no enrichment vs. transfection enrichment	ns	0.95	ns	0.78	ns	0.61	ns	>0.99	ns	0.06	ns	0.95	ns	0.87	ns	0.88	ns	0.72	ns	0.3	ns	0.4	ns	>0.99	ns	0.95	ns	0.24	ns	0.52
no enrichment vs. PEAR enrichment	ns	0.89	ns	0.85	ns	>0.99	ns	0.99	ns	0.99	ns	0.57	ns	0.99	ns	0.88	ns	0.72	ns	0.68	ns	0.4	ns	0.71	ns	0.82	*	0.01	ns	0.14
transfection enrichment vs. PEAR enrichment	ns	>0.99	ns	0.35	ns	0.61	ns	>0.99	*	0.04	ns	0.32	ns	0.72	ns	0.5	ns	>0.99	ns	0.87	ns	>0.99	ns	0.75	ns	0.98	ns	0.22	*	0.02
Fig3g
	untransfected			no enrichment			transfection enrichment			PEAR enrichment
EMX1-OT1	0.02	0.02	0.03	0.01	0.02	0.01	0.05	0.02	0.01	0.02	0.03	0.01
EMX1-OT2	0.01	0.02	0.01	0	0.02	0.01	0.01	0.03	0.01	0.02	0.01	0.01
EMX1-OT3	0	0.01	0.01	0	0.01	0.01	0.02	0	0.01	0	0	0.01
FANCF-OT1	0	0.01	0.01	0.02	0.01	0.03	0.01	0.02	0.01	0.02	0.01	0
FANCF-OT2	0	0.01	0	0	0	0.01	0.01	0.02	0	0	0.01	0.01
FANCF-OT3	0.01	0.01	0.02	0.01	0.02	0.01	0.01	0	0	0.02	0.01	0.01
FANCF-OT4	0.01	0	0.01	0	0.01	0.01	0.01	0.01	0.01	0.01	0.01	0.01
HEK3-OT1	0.01	0	0	0	0	0	0	0	0	0	0	0.01
HEK3-OT2	0.03	0.03	0.02	0.02	0.03	0.02	0	0.02	0.02	0.03	0.02	0.02
HEK3-OT3	0.65	0.77	0.79	0.94	1.1	0.78	0.87	1.19	0.8	1.02	0.59	0.01
HEK3-OT4	0.4	0.2	0.09	0.03	0.35	0.23	0.01	0.22	0.02	0.01	0.54	0.01
HEK4-OT1	1.14	1.6	0.2	1.13	0.61	0.76	0.65	1.64	0.63	0.28	0.14	1.44
HEK4-OT2	0.04	0.2	0.04	0.02	0.04	0.06	0.04	0.04	0.03	0.08	0.16	0.06
HEK4-OT3	0.17	0.14	0.11	0.39	0.93	0.25	0.43	1.09	1.05	1.05	0.8	1.42
HEK4-OT4	0.03	0.02	0.01	0.02	0.01	0.03	0.03	0.02	0.02	0.02	0.02	0.01
	EMX1-OT1		EMX1-OT2		EMX1-OT3		FANCF-OT1		FANCF-OT2		FANCF-OT3		FANCF-OT4		HEK3-OT1		HEK3-OT2		HEK3-OT3		HEK3-OT4		HEK4-OT1		HEK4-OT2		HEK4-OT3		HEK4-OT4
Tukey's / Dunn's multiple comparisons test	Summary	Adjusted P Value	Summary	Adjusted P Value	Summary	Adjusted P Value	Summary	Adjusted P Value	Summary	Adjusted P Value	Summary	Adjusted P Value	Summary	Adjusted P Value	Summary	Adjusted P Value	Summary	Adjusted P Value	Summary	Adjusted P Value	Summary	Adjusted P Value	Summary	Adjusted P Value	Summary	Adjusted P Value	Summary	Adjusted P Value	Summary	Adjusted P Value
untransfected cells vs. no enrichment	ns	0.75	ns	0.96	ns	>0.99	ns	0.26	ns	>0.99	ns	>0.99	ns	>0.99	ns	0.75	ns	0.95	ns	0.82	ns	>0.99	ns	0.99	ns	0.64	ns	0.45	ns	>0.99
untransfected cells vs. transfection enrichment	ns	0.99	ns	0.96	ns	0.94	ns	0.75	ns	0.67	ns	0.23	ns	0.75	ns	0.75	ns	0.22	ns	0.79	ns	0.8	ns	>0.99	ns	0.6	ns	0.08	ns	0.96
untransfected cells vs. PEAR enrichment	ns	0.99	ns	>0.99	ns	0.94	ns	0.96	ns	0.94	ns	>0.99	ns	0.75	ns	>0.99	ns	0.95	ns	0.84	ns	>0.99	ns	0.88	ns	>0.99	*	0.02	ns	0.96
no enrichment vs. transfection enrichment	ns	0.57	ns	0.78	ns	0.94	ns	0.75	ns	0.67	ns	0.23	ns	0.75	ns	>0.99	ns	0.43	ns	>0.99	ns	0.88	ns	>0.99	ns	>0.99	ns	0.56	ns	0.96
no enrichment vs. PEAR enrichment	ns	0.91	ns	0.96	ns	0.94	ns	0.48	ns	0.94	ns	>0.99	ns	0.75	ns	0.75	ns	>0.99	ns	0.38	ns	>0.99	ns	0.97	ns	0.56	ns	0.18	ns	0.96
transfection enrichment vs. PEAR enrichment	ns	0.91	ns	0.96	ns	0.67	ns	0.96	ns	0.94	ns	0.23	ns	>0.99	ns	0.75	ns	0.43	ns	0.36	ns	0.92	ns	0.88	ns	0.52	ns	0.78	ns	0.75

## Sheet: figure 3g
Fig3g
	untransfected			no enrichment			transfection enrichment			PEAR enrichment
EMX1-OT1	0.02	0.02	0.03	0.01	0.02	0.01	0.05	0.02	0.01	0.02	0.03	0.01
EMX1-OT2	0.01	0.02	0.01	0	0.02	0.01	0.01	0.03	0.01	0.02	0.01	0.01
EMX1-OT3	0	0.01	0.01	0	0.01	0.01	0.02	0	0.01	0	0	0.01
FANCF-OT1	0	0.01	0.01	0.02	0.01	0.03	0.01	0.02	0.01	0.02	0.01	0
FANCF-OT2	0	0.01	0	0	0	0.01	0.01	0.02	0	0	0.01	0.01
FANCF-OT3	0.01	0.01	0.02	0.01	0.02	0.01	0.01	0	0	0.02	0.01	0.01
FANCF-OT4	0.01	0	0.01	0	0.01	0.01	0.01	0.01	0.01	0.01	0.01	0.01
HEK3-OT1	0.01	0	0	0	0	0	0	0	0	0	0	0.01
HEK3-OT2	0.03	0.03	0.02	0.02	0.03	0.02	0	0.02	0.02	0.03	0.02	0.02
HEK3-OT3	0.65	0.77	0.79	0.94	1.1	0.78	0.87	1.19	0.8	1.02	0.59	0.01
HEK3-OT4	0.4	0.2	0.09	0.03	0.35	0.23	0.01	0.22	0.02	0.01	0.54	0.01
HEK4-OT1	1.14	1.6	0.2	1.13	0.61	0.76	0.65	1.64	0.63	0.28	0.14	1.44
HEK4-OT2	0.04	0.2	0.04	0.02	0.04	0.06	0.04	0.04	0.03	0.08	0.16	0.06
HEK4-OT3	0.17	0.14	0.11	0.39	0.93	0.25	0.43	1.09	1.05	1.05	0.8	1.42
HEK4-OT4	0.03	0.02	0.01	0.02	0.01	0.03	0.03	0.02	0.02	0.02	0.02	0.01
	EMX1-OT1		EMX1-OT2		EMX1-OT3		FANCF-OT1		FANCF-OT2		FANCF-OT3		FANCF-OT4		HEK3-OT1		HEK3-OT2		HEK3-OT3		HEK3-OT4		HEK4-OT1		HEK4-OT2		HEK4-OT3		HEK4-OT4
Tukey's multiple comparisons test	Summary	Adjusted P Value	Summary	Adjusted P Value	Summary	Adjusted P Value	Summary	Adjusted P Value	Summary	Adjusted P Value	Summary	Adjusted P Value	Summary	Adjusted P Value	Summary	Adjusted P Value	Summary	Adjusted P Value	Summary	Adjusted P Value	Summary	Adjusted P Value	Summary	Adjusted P Value	Summary	Adjusted P Value	Summary	Adjusted P Value	Summary	Adjusted P Value
untransfected cells vs. no enrichment	ns	0.7538	ns	0.9633	ns	>0,9999	ns	0.2641	ns	>0,9999	ns	>0,9999	ns	>0,9999	ns	0.7538	ns	0.9481	ns	0.8224	ns	0.9983	ns	0.9898	ns	0.6412	ns	0.4515	ns	>0,9999
untransfected cells vs. transfection enrichment	ns	0.9863	ns	0.9633	ns	0.9361	ns	0.7538	ns	0.669	ns	0.2252	ns	0.7538	ns	0.7538	ns	0.2203	ns	0.7945	ns	0.8042	ns	>0,9999	ns	0.5991	ns	0.0756	ns	0.9568
untransfected cells vs. PEAR enrichment	ns	0.9863	ns	>0,9999	ns	0.9361	ns	0.9568	ns	0.9361	ns	>0,9999	ns	0.7538	ns	>0,9999	ns	0.9481	ns	0.8359	ns	0.9928	ns	0.8787	ns	0.9987	*	0.0202	ns	0.9568
no enrichment vs. transfection enrichment	ns	0.5693	ns	0.7838	ns	0.9361	ns	0.7538	ns	0.669	ns	0.2252	ns	0.7538	ns	>0,9999	ns	0.4282	ns	>0,9999	ns	0.8791	ns	0.9911	ns	0.9998	ns	0.5584	ns	0.9568
no enrichment vs. PEAR enrichment	ns	0.9067	ns	0.9633	ns	0.9361	ns	0.4801	ns	0.9361	ns	>0,9999	ns	0.7538	ns	0.7538	ns	>0,9999	ns	0.3822	ns	0.9996	ns	0.9701	ns	0.5574	ns	0.177	ns	0.9568
transfection enrichment vs. PEAR enrichment	ns	0.9067	ns	0.9633	ns	0.669	ns	0.9568	ns	0.9361	ns	0.2252	ns	>0,9999	ns	0.7538	ns	0.4282	ns	0.3572	ns	0.9175	ns	0.8843	ns	0.5167	ns	0.7815	ns	0.7538
Fig3f
	untransfected			no enrichment			transfection enrichment			PEAR enrichment
EMX1-OT1	0.26	0.26	0.18	0.26	0.29	0.34	0.25	0.28	0.31	0.32	0.26	0.24
EMX1-OT2	0.3	0.36	0.27	0.29	0.34	0.32	0.3	0.31	0.27	0.36	0.33	0.32
EMX1-OT3	0.86	0.85	0.79	0.88	0.84	0.75	0.78	0.68	0.83	0.81	0.79	0.87
FANCF-OT1	1.05	1.08	1.1	1.06	1.14	1.14	1.21	1.12	1.03	1	1.2	1.2
FANCF-OT2	0.12	0.16	0.14	0.19	0.19	0.18	0.13	0.15	0.1	0.19	0.23	0.16
FANCF-OT3	0.56	0.57	0.54	0.54	0.63	0.6	0.61	0.58	0.54	0.61	0.64	0.62
FANCF-OT4	1.21	1.28	1.22	1.29	1.29	1.21	1.19	1.26	1.24	1.19	1.35	1.29
HEK3-OT1	0.14	0.2	0.18	0.2	0.22	0.18	0.17	0.21	0.18	0.2	0.23	0.21
HEK3-OT2	0.04	0.06	0.04	0.05	0.04	0.07	0.04	0.05	0.04	0.05	0.03	0.05
HEK3-OT3	0.25	0.24	0.22	0.21	0.24	0.18	0.25	0.26	0.22	0.24	0.21	0.24
HEK3-OT4	0.21	0.22	0.24	0.26	0.25	0.23	0.19	0.2	0.26	0.22	0.22	0.21
HEK4-OT1	0.17	0.2	0.19	0.1	0.06	0.34	0.1	0.27	0.11	0.08	0.14	0.03
HEK4-OT2	0.11	0.13	0.11	0.13	0.11	0.15	0.12	0.1	0.14	0.11	0.15	0.08
HEK4-OT3	0.05	0.06	0.03	0.3	0.82	0.86	1.32	1.22	1.28	2.48	1.2	2.04
HEK4-OT4	0.19	0.2	0.2	0.17	0.19	0.19	0.14	0.16	0.18	0.21	0.2	0.26
	EMX1-OT1		EMX1-OT2		EMX1-OT3		FANCF-OT1		FANCF-OT2		FANCF-OT3		FANCF-OT4		HEK3-OT1		HEK3-OT2		HEK3-OT3		HEK3-OT4		HEK4-OT1		HEK4-OT2		HEK4-OT3		HEK4-OT4
Tukey's / Dunn's multiple comparisons test	Summary	Adjusted P Value	Summary	Adjusted P Value	Summary	Adjusted P Value	Summary	Adjusted P Value	Summary	Adjusted P Value	Summary	Adjusted P Value	Summary	Adjusted P Value	Summary	Adjusted P Value	Summary	Adjusted P Value	Summary	Adjusted P Value	Summary	Adjusted P Value	Summary	Adjusted P Value	Summary	Adjusted P Value	Summary	Adjusted P Value	Summary	Adjusted P Value
untransfected cells vs. no enrichment	ns	0.29	ns	>0.99	ns	>0.99	ns	0.94	ns	0.16	ns	0.57	ns	0.93	ns	0.5	ns	0.89	ns	0.47	ns	0.59	ns	>0.99	ns	0.89	ns	0.24	ns	0.85
untransfected cells vs. transfection enrichment	ns	0.52	ns	0.9	ns	0.49	ns	0.9	ns	0.9	ns	0.85	ns	>0.99	ns	0.88	ns	0.98	ns	0.98	ns	0.98	ns	0.98	ns	>0.99	*	0.01	ns	0.19
untransfected cells vs. PEAR enrichment	ns	0.63	ns	0.71	ns	>0.99	ns	0.81	ns	0.1	ns	0.11	ns	0.8	ns	0.21	ns	0.98	ns	0.98	ns	0.98	ns	0.56	ns	>0.99	**	0.001	ns	0.41
no enrichment vs. transfection enrichment	ns	0.95	ns	0.78	ns	0.61	ns	>0.99	ns	0.06	ns	0.95	ns	0.87	ns	0.88	ns	0.72	ns	0.3	ns	0.4	ns	>0.99	ns	0.95	ns	0.24	ns	0.52
no enrichment vs. PEAR enrichment	ns	0.89	ns	0.85	ns	>0.99	ns	0.99	ns	0.99	ns	0.57	ns	0.99	ns	0.88	ns	0.72	ns	0.68	ns	0.4	ns	0.71	ns	0.82	*	0.01	ns	0.14
transfection enrichment vs. PEAR enrichment	ns	>0.99	ns	0.35	ns	0.61	ns	>0.99	*	0.04	ns	0.32	ns	0.72	ns	0.5	ns	>0.99	ns	0.87	ns	>0.99	ns	0.75	ns	0.98	ns	0.22	*	0.02
Fig3g
	untransfected			no enrichment			transfection enrichment			PEAR enrichment
EMX1-OT1	0.02	0.02	0.03	0.01	0.02	0.01	0.05	0.02	0.01	0.02	0.03	0.01
EMX1-OT2	0.01	0.02	0.01	0	0.02	0.01	0.01	0.03	0.01	0.02	0.01	0.01
EMX1-OT3	0	0.01	0.01	0	0.01	0.01	0.02	0	0.01	0	0	0.01
FANCF-OT1	0	0.01	0.01	0.02	0.01	0.03	0.01	0.02	0.01	0.02	0.01	0
FANCF-OT2	0	0.01	0	0	0	0.01	0.01	0.02	0	0	0.01	0.01
FANCF-OT3	0.01	0.01	0.02	0.01	0.02	0.01	0.01	0	0	0.02	0.01	0.01
FANCF-OT4	0.01	0	0.01	0	0.01	0.01	0.01	0.01	0.01	0.01	0.01	0.01
HEK3-OT1	0.01	0	0	0	0	0	0	0	0	0	0	0.01
HEK3-OT2	0.03	0.03	0.02	0.02	0.03	0.02	0	0.02	0.02	0.03	0.02	0.02
HEK3-OT3	0.65	0.77	0.79	0.94	1.1	0.78	0.87	1.19	0.8	1.02	0.59	0.01
HEK3-OT4	0.4	0.2	0.09	0.03	0.35	0.23	0.01	0.22	0.02	0.01	0.54	0.01
HEK4-OT1	1.14	1.6	0.2	1.13	0.61	0.76	0.65	1.64	0.63	0.28	0.14	1.44
HEK4-OT2	0.04	0.2	0.04	0.02	0.04	0.06	0.04	0.04	0.03	0.08	0.16	0.06
HEK4-OT3	0.17	0.14	0.11	0.39	0.93	0.25	0.43	1.09	1.05	1.05	0.8	1.42
HEK4-OT4	0.03	0.02	0.01	0.02	0.01	0.03	0.03	0.02	0.02	0.02	0.02	0.01
	EMX1-OT1		EMX1-OT2		EMX1-OT3		FANCF-OT1		FANCF-OT2		FANCF-OT3		FANCF-OT4		HEK3-OT1		HEK3-OT2		HEK3-OT3		HEK3-OT4		HEK4-OT1		HEK4-OT2		HEK4-OT3		HEK4-OT4
Tukey's / Dunn's multiple comparisons test	Summary	Adjusted P Value	Summary	Adjusted P Value	Summary	Adjusted P Value	Summary	Adjusted P Value	Summary	Adjusted P Value	Summary	Adjusted P Value	Summary	Adjusted P Value	Summary	Adjusted P Value	Summary	Adjusted P Value	Summary	Adjusted P Value	Summary	Adjusted P Value	Summary	Adjusted P Value	Summary	Adjusted P Value	Summary	Adjusted P Value	Summary	Adjusted P Value
untransfected cells vs. no enrichment	ns	0.75	ns	0.96	ns	>0.99	ns	0.26	ns	>0.99	ns	>0.99	ns	>0.99	ns	0.75	ns	0.95	ns	0.82	ns	>0.99	ns	0.99	ns	0.64	ns	0.45	ns	>0.99
untransfected cells vs. transfection enrichment	ns	0.99	ns	0.96	ns	0.94	ns	0.75	ns	0.67	ns	0.23	ns	0.75	ns	0.75	ns	0.22	ns	0.79	ns	0.8	ns	>0.99	ns	0.6	ns	0.08	ns	0.96
untransfected cells vs. PEAR enrichment	ns	0.99	ns	>0.99	ns	0.94	ns	0.96	ns	0.94	ns	>0.99	ns	0.75	ns	>0.99	ns	0.95	ns	0.84	ns	>0.99	ns	0.88	ns	>0.99	*	0.02	ns	0.96
no enrichment vs. transfection enrichment	ns	0.57	ns	0.78	ns	0.94	ns	0.75	ns	0.67	ns	0.23	ns	0.75	ns	>0.99	ns	0.43	ns	>0.99	ns	0.88	ns	>0.99	ns	>0.99	ns	0.56	ns	0.96
no enrichment vs. PEAR enrichment	ns	0.91	ns	0.96	ns	0.94	ns	0.48	ns	0.94	ns	>0.99	ns	0.75	ns	0.75	ns	>0.99	ns	0.38	ns	>0.99	ns	0.97	ns	0.56	ns	0.18	ns	0.96
transfection enrichment vs. PEAR enrichment	ns	0.91	ns	0.96	ns	0.67	ns	0.96	ns	0.94	ns	0.23	ns	>0.99	ns	0.75	ns	0.43	ns	0.36	ns	0.92	ns	0.88	ns	0.52	ns	0.78	ns	0.75
