# Supplementary material for: PEAR, a flexible fluorescent reporter for the identification and enrichment of successfully prime edited cells
Source: eLife. 2022 Feb 23;11:e69504. doi: 10.7554/eLife.69504 (PMC8865850; doi:10.7554/eLife.69504)
Supplement: Figure 4—source data 1. [file elife-69504-fig4-data1.xlsx]

## Sheet: Figure 4c
Fig4c
	untransfected			no enrichment			transfection enrichment			PEAR enrichment
HEK3 +1 CTT ins	0	0	0	19.71	8.08	25.66	39.24	41.28	38.56	63.08	63.91	67.31
RUNX1 +1 ATG ins	0	0	0	41.8	36.97	18.77	56.33	52.69	48.39	83.18	84.78	70.5
HEXA 1278insTATC	0	0	0	9.39	9.18	5.27	14.12	15.16	11.71	38.35	34.12	25.71
EMX1 +5 G del	0.01	0	0.01	5.4	5.32	5.54	10.18	10.18	11.58	25.71	24.68	24.93
RUNX1 +2 G del	0	0	0	41.82	40.93	35.42	57.46	56.94	48.24	85.09	83.38	83.62
DNMT +3-5 AGG del	0	0	0	2.49	24.89	29.75	9.36	37.42	39.35	43.66	71.6	71.92
FANCF +2 C del; +5 G to T	0	0	0	25.11	26.96	28.5	59.38	45.55	41.68	71.18	74.17	63.28
HBB +4 A to T	2.18	2.23	2.12	16.19	17.79	19.49	29.34	27.96	28.61	51.71	46.18	49.34
PRNP +6 G to T	0.09	0.1	0.09	19.71	16.68	17.71	29.78	25.6	26.16	53.12	53.74	52.63
	HEK3 +1 CTT ins		RUNX1 +1 ATG ins		HEXA 1278insTATC		EMX1 +5 G del		RUNX1 +2 G del		DNMT +3-5 AGG del		FANCF +2 C del; +5 G to T		HBB +4 A to T		PRNP +6 G to T
Tukey's / Dunn's multiple comparisons test	Summary	Adjusted P Value	Summary	Adjusted P Value	Summary	Adjusted P Value	Summary	Adjusted P Value	Summary	Adjusted P Value	Summary	Adjusted P Value	Summary	Adjusted P Value	Summary	Adjusted P Value	Summary	Adjusted P Value
untransfected cells vs. no enrichment			**	0.003	ns	0.09	***	<0.001	***	<0.001	ns	0.38	**	0.001	***	<0.001	***	<0.001
untransfected cells vs. transfection enrichment			***	<0.001	**	0.006	***	<0.001	***	<0.001	ns	0.12	***	<0.001	***	<0.001	***	<0.001
untransfected cells vs. PEAR enrichment			***	<0.001	***	<0.001	***	<0.001	***	<0.001	**	0.002	***	<0.001	***	<0.001	***	<0.001
no enrichment vs. transfection enrichment	**	0.006	*	0.05	ns	0.27	***	<0.001	**	0.002	ns	0.82	**	0.005	***	<0.001	***	<0.001
no enrichment vs. PEAR enrichment	***	<0.001	***	<0.001	***	<0.001	***	<0.001	***	<0.001	*	0.02	***	<0.001	***	<0.001	***	<0.001
transfection enrichment vs. PEAR enrichment	**	0.003	**	0.01	***	<0.001	***	<0.001	***	<0.001	ns	0.07	**	0.008	***	<0.001	***	<0.001

## Sheet: Figure 4d
Fig4d
	untransfected			no enrichment			transfection enrichment			PEAR enrichment
HEK3 +1 CTT ins	0.53	0.1	0.01	6.24	1.25	6.94	13.64	10.96	10.83	9.13	12.44	11.3
RUNX1 +1 ATG ins	0.01	0	0.01	4.55	1.84	1.64	5.7	4.91	5	7.28	7.12	5.46
HEXA 1278insTATC	1.76	2.47	3.47	0.66	1.2	1.05	2.24	1.01	0.73	3.86	16.81	3.39
EMX1 +5 G del	1.99	1.53	3.78	1.15	0.58	1.71	4.47	5.61	2.14	1.9	4.33	1.28
RUNX1 +2 G del	0.01	0	0.01	3.74	2.99	3.03	4.37	3.94	5.32	5.24	4.97	7.16
DNMT +3-5 AGG del	0.01	0.01	0.02	1.62	2.56	4.6	0.75	3.94	3.51	2.54	6.77	8.04
FANCF +2 C del; +5 G to T	7.41	6.25	2.19	23.81	23.56	20.87	20.7	22.19	20.2	19.66	17.21	20.82
HBB +4 A to T	0.03	0.04	0.03	4.35	5.52	9.45	15.19	9.98	10.52	15.41	12.27	13.69
PRNP +6 G to T	0.03	4.03	0.17	4.26	12.61	11.09	8.98	10.4	13.93	11.7	13.82	9.73
	HEK3 +1 CTT ins		RUNX1 +1 ATG ins		HEXA 1278insTATC		EMX1 +5 G del		RUNX1 +2 G del		DNMT +3-5 AGG del		FANCF +2 C del; +5 G to T		HBB +4 A to T		PRNP +6 G to T
					Box-Cox transformed (lambda=-0.5)
Tukey's / Dunn's multiple comparisons test	Summary	Adjusted P Value	Summary	Adjusted P Value	Summary	Adjusted P Value	Summary	Adjusted P Value	Summary	Adjusted P Value	Summary	Adjusted P Value	Summary	Adjusted P Value	Summary	Adjusted P Value	Summary	Adjusted P Value
untransfected cells vs. no enrichment	ns	0.08	*	0.04	ns	0.1	ns	0.67	**	0.003	ns	0.29	***	<0.001	*	0.02	*	0.05
untransfected cells vs. transfection enrichment	***	<0.001	***	<0.001	ns	0.25	ns	0.5	***	<0.001	ns	0.34	***	<0.001	***	<0.001	*	0.02
untransfected cells vs. PEAR enrichment	***	<0.001	***	<0.001	ns	0.52	ns	>0.99	***	<0.001	*	0.02	***	<0.001	***	<0.001	*	0.01
no enrichment vs. transfection enrichment	**	0.01	ns	0.05	ns	0.92	ns	0.11	ns	0.21	ns	>0.99	ns	0.7	ns	0.05	ns	0.88
no enrichment vs. PEAR enrichment	*	0.02	**	0.005	*	0.01	ns	0.63	*	0.01	ns	0.3	ns	0.19	*	0.01	ns	0.76
transfection enrichment vs. PEAR enrichment	ns	0.95	ns	0.35	*	0.04	ns	0.53	ns	0.23	ns	0.26	ns	0.67	ns	0.7	ns	>0.99

## Sheet: Figure 4e
Fig4e
	no enrichment			transfection enrichment			PEAR enrichment
HEK3 +1 CTT ins	3.15865	6.464	3.69741	2.87683	3.76642	3.56048	6.90909	5.13746	5.95664
RUNX1 +1 ATG ins	9.18681	20.0924	11.4451	9.88246	10.7312	9.678	11.4258	11.9073	12.9121
HEXA 1278insTATC	14.2273	7.65	5.01905	6.30357	15.0099	16.0411	9.93523	2.02974	7.58407
EMX1 +5 G del	4.69565	9.17241	3.23977	2.2774	1.81462	5.41122	13.5316	5.69977	19.4766
RUNX1 +2 G del	11.1818	13.689	11.6898	13.1487	14.4518	9.06767	16.2386	16.7767	11.6788
DNMT +3-5 AGG del	1.53704	9.72266	6.46739	12.48	9.49746	11.2108	17.189	10.5761	8.94527
FANCF +2 C del; +5 G to T	1.0546	1.14431	1.3656	2.8686	2.05273	2.06337	3.62055	4.3097	3.03938
HBB +4 A to T	3.72184	3.22283	2.06243	1.93153	2.8016	2.71958	3.35561	3.76365	3.60409
PRNP +6 G to T	4.62676	1.32276	1.59693	3.31626	2.46154	1.87796	4.54017	3.88857	5.40904
	HEK3 +1 CTT ins		RUNX1 +1 ATG ins		HEXA 1278insTATC		EMX1 +5 G del		RUNX1 +2 G del		DNMT +3-5 AGG del		FANCF +2 C del; +5 G to T		HBB +4 A to T		PRNP +6 G to T
			Box-Cox transformed (lambda=-6.5)
Tukey's / Dunn's multiple comparisons test	Summary	Adjusted P Value	Summary	Adjusted P Value	Summary	Adjusted P Value	Summary	Adjusted P Value	Summary	Adjusted P Value	Summary	Adjusted P Value	Summary	Adjusted P Value	Summary	Adjusted P Value	Summary	Adjusted P Value
no enrichment vs. transfection enrichment	ns	0.56	ns	0.84	ns	0.66	ns	0.78	ns	>0,99	ns	0.26	ns	0.05	ns	0.55	ns	>0,99
no enrichment vs. PEAR enrichment	ns	0.31	ns	0.66	ns	0.81	ns	0.2	ns	0.41	ns	0.16	**	0.002	ns	0.49	ns	0.17
transfection enrichment vs. PEAR enrichment	ns	0.08	ns	0.36	ns	0.34	ns	0.09	ns	0.42	ns	0.92	*	0.03	ns	0.13	ns	0.18
